# Molecular epidemiology of recurrent zoonotic transmission of mpox virus in West Africa

Delia Doreen Djuicy\*<sup>1</sup>, Ifeanyi F. Omah\*<sup>2,3</sup>, Edyth Parker\*<sup>4,5</sup>, Christopher H Tomkins-Tinch<sup>6</sup>, James Richard Otieno<sup>7</sup>, Moïse Henri Moubeket Yifomnjou<sup>1</sup>, Loique Landry Messanga Essengue<sup>1</sup>, Akeemat Opeyemi Ayinla<sup>4</sup>, Ayotunde E. Sijuwola<sup>4</sup>, Muhammad I. Ahmed<sup>4</sup>, Oludayo O. Ope-ewe<sup>4</sup>, Olusola Akinola Ogunsanya<sup>4</sup>, Alhaji Olono<sup>4</sup>, Philomena Eromon<sup>4</sup>, Martial Gides Wansi Yonga<sup>1</sup>, Gael Dieudonné Essima<sup>1</sup>, Ibrahim Pascal Touoyem<sup>1</sup>, Landry Jules Mouliem Mouchili<sup>1</sup>, Sara Irene Eyangoh<sup>1</sup>, Linda Ezzo<sup>8</sup>, Inès Mandah Emah Nguidjol<sup>8</sup>, Steve Franck Metomb<sup>8</sup>, Cornelius Chebo<sup>8</sup>, Samuel Mbah Agwe<sup>8</sup>, Hans Makembe Mossi<sup>8</sup>, Chanceline Ndongo Bilounga<sup>8</sup>, Alain Georges Mballa Etoundi<sup>1</sup>, Olusola Akanbi<sup>9</sup>, Abiodun Egwuenu<sup>9</sup>, Odianosen Ehiakhamen<sup>9</sup>, Chimaobi Chukwu<sup>9</sup>, Kabiru Suleiman<sup>9</sup>, Afolabi Akinpelu<sup>9</sup>, Adama Ahmad<sup>9</sup>, Khadijah Isa Imam<sup>9</sup>, Richard Ojedele<sup>9</sup>, Victor Oripenaye<sup>9</sup>, Kenneth Ikeata<sup>9</sup>, Sophiyah Adelakun<sup>9</sup>, Babatunde Olajumoke<sup>9</sup>, Áine O'Toole<sup>2</sup>, Andrew Magee<sup>10</sup>, Mark Zeller<sup>5</sup>, Karthik Gangavarapu<sup>5</sup>, Patrick Varilly<sup>6</sup>, Daniel J Park<sup>6</sup>, Gerald Mboowa<sup>11</sup>, Sofonias Kifle Tessema<sup>11</sup>, Yewew Kebede Tebeje<sup>11</sup>, Onikepe Folarin<sup>4,12</sup>, Anise Happi<sup>4</sup>, Philippe Lemey<sup>13</sup>, Marc A Suchard<sup>10,14,15</sup>, Kristian G. Andersen<sup>5,16</sup>, Pardis Sabeti<sup>6,17</sup>, Andrew Rambaut<sup>2</sup>, Chikwe Ihekweazu<sup>9</sup>, Idriss Jide<sup>9</sup>, Ifedayo Adetifa<sup>9</sup>, Richard Njourn<sup>1</sup>, Christian T Happi<sup>4,12,17+</sup>

\*These authors contributed equally to this work

+ Correspondences: Christian T Happi ([happic@run.edu.ng](mailto:happic@run.edu.ng))

1. Virology Service, Centre Pasteur du Cameroun, 451 Rue 2005, Yaounde 2, P.O. Box 1274
2. Institute of Ecology and Evolution, University of Edinburgh, The King's Buildings, Edinburgh EH9 3FL, UK.
3. Department of Parasitology and Entomology, Nnamdi Azikiwe University, Awka, Nigeria.
4. African Center of Excellence for Genomics of Infectious Diseases, Redeemer's University, Ede, Osun State, Nigeria
5. Department of Immunology and Microbiology, The Scripps Research Institute, La Jolla, CA, USA
6. The Broad Institute of MIT and Harvard, Cambridge, MA 02142, USA
7. Theiagen Genomics, Highlands Ranch, CO, USA
8. Department for the Control of Disease, Epidemics and Pandemics, Ministry of Public Health, Yaounde, Cameroon
9. Nigeria Centre for Disease Control and Prevention., Abuja, Nigeria
10. Department of Human Genetics, David Geffen School of Medicine, University of California, Los Angeles, Los Angeles, CA 90095, USA
11. Africa Centres for Disease Control and Prevention (Africa CDC), Addis Ababa, Ethiopia
12. Department of Biological Sciences, Redeemer's University, Ede, Osun State, Nigeria.
13. Department of Microbiology, Immunology and Transplantation, Rega Institute, KU Leuven, Leuven, Belgium
14. Department of Biomathematics, David Geffen School of Medicine, University of California, Los Angeles, Los Angeles, CA 90095, USA.
15. Department of Biostatistics, Fielding School of Public Health, University of California, Los Angeles, Los Angeles, CA 90095, USA
16. Scripps Research Translational Institute, La Jolla, CA 92037, USA.
17. Department of Immunology and Infectious Diseases, Harvard T H Chan School of Public Health, Boston, MA 02115, USA

1 **Nigeria and Cameroon reported their first mpox cases in over three decades in 2017**  
2 **and 2018 respectively. The outbreak in Nigeria is recognised as an ongoing human**  
3 **epidemic. However, owing to sparse surveillance and genomic data, it is not known**  
4 **whether the increase in cases in Cameroon is driven by zoonotic or sustained**  
5 **human transmission. Notably, the frequency of zoonotic transmission remains**  
6 **unknown in both Cameroon and Nigeria. To address these uncertainties, we**  
7 **investigated the zoonotic transmission dynamics of the mpox virus (MPXV) in**  
8 **Cameroon and Nigeria, with a particular focus on the border regions. We show that**  
9 **in these regions mpox cases are still driven by zoonotic transmission of a newly**  
10 **identified Clade IIb.1. We identify two distinct zoonotic lineages that circulate**  
11 **across the Nigeria-Cameroon border, with evidence of recent and historic cross**  
12 **border dissemination. Our findings support that the complex cross-border forest**  
13 **ecosystems likely hosts shared animal populations that drive cross-border viral**  
14 **spread, which is likely where extant Clade IIb originated. We identify that the**  
15 **closest zoonotic outgroup to the human epidemic circulated in southern Nigeria in**  
16 **October 2013. We also show that the zoonotic precursor lineage circulated in an**  
17 **animal population in southern Nigeria for more than 45 years. This supports**  
18 **findings that southern Nigeria was the origin of the human epidemic. Our study**  
19 **highlights the ongoing MPXV zoonotic transmission in Cameroon and Nigeria,**  
20 **underscoring the continuous risk of MPXV (re)emergence.**

21  
22 Mpox is a viral zoonosis resulting from infection with the *Orthopoxvirus* mpox virus  
23 (MPXV) that is endemic in as-yet-unknown animal reservoirs in West and Central  
24 Africa.<sup>1,2</sup> Since MPXV was first characterized in humans in the Democratic Republic of  
25 the Congo (DRC) in 1970, there have been limited outbreaks and sporadic cases in rural  
26 regions of endemic countries.<sup>3–5</sup> However, since 2016, there have been a marked  
27 increase in mpox cases in endemic as well as non-endemic countries in Africa.<sup>2</sup> It is  
28 unclear whether the increase in cases across the region is driven by increased zoonotic  
29 infections, or whether MPXV may have cryptically emerged to sustained transmission in  
30 the human population.<sup>6,7</sup> Notably, Nigeria and Cameroon reported their first mpox cases  
31 in over three decades in September 2017 and May 2018 respectively.<sup>5,7–9</sup> The Nigerian  
32 outbreak has now been recognised as an ongoing human epidemic, driven by sustained  
33 transmission after emergence in the human population around 2014.<sup>10–12</sup> MPXV has two  
34 major clades: Clade 1, which is endemic to non-human animals in Central Africa, and

35 Clade II with subclades Clade IIa and Clade IIb, which are endemic in Nigeria and the  
36 wider West Africa.<sup>1,13</sup> The Clade IIb sequences representing the sustained human-to-  
37 human transmission in Nigeria from 2017 onwards are referred to as hMPXV-1.<sup>10,11,14</sup>

38  
39 Contrastingly, Cameroon's recent increased incidence was driven by sporadic cases and  
40 limited outbreaks resulting from zoonotic transmission.<sup>7</sup> Recent work has shown that  
41 zoonotic cases in Cameroon are driven by Clade I and Clade IIb.<sup>7</sup> The clade distribution  
42 in Cameroon is structured by the biogeographic barrier of the Sanaga river as well as  
43 segregated forest systems, including the Congo Basin Forests, the Cameroonian  
44 Highlands Forests, and the Lower Guinean Forests.<sup>7</sup> The Nigeria-Cameroon border is  
45 covered by the contiguous Cameroonian Highlands forest belt that extends into both  
46 countries. These forest ecosystems provide suitable ecological conditions to host animal  
47 reservoirs that may move across borders.<sup>15,16</sup> In these regions, agricultural activities,  
48 subsistence hunting, the consumption of wild game and human settlements in forested  
49 areas owing to internal displacement heightens exposure at the human-animal interface  
50 as well as the associated risk of zoonotic transmission.<sup>7,9</sup> There is also a high level of  
51 human movement across the long and porous Nigeria-Cameroon border. This can  
52 potentially drive bidirectional transmission across the border, especially as the human  
53 epidemic in Nigeria and incidence in Cameroon continues to grow.<sup>9,12</sup>

54  
55 However, the transmission dynamics of MPXV across the Nigeria-Cameroon border  
56 remains obscured with limited sampling. With sparse genomic data from the region, the  
57 frequency of continued zoonotic transmission and the associated risk of re-emergence in  
58 Nigeria and Cameroon remains unknown.<sup>12</sup> It is unclear whether the increased number

59 of cases in Cameroon were introductions from the ongoing human epidemic in Nigeria, if  
60 they were driven by zoonotic spillover events, or cryptic sustained human-to-human  
61 transmission as observed in Nigeria.<sup>7,9</sup> It is vital to improve our understanding of the  
62 transmission dynamics across the border to better understand the risk of bidirectional  
63 transmission and recurrent spillover events in both countries. Enhanced genomic  
64 surveillance of MPXV in Cameroon and Nigeria, particularly from the forested border  
65 regions, could provide insight into these questions. To address this, we generated new  
66 genomic data to investigate the zoonotic transmission dynamics of MPXV in Cameroon  
67 and Nigeria as part of a Pan-African consortium formed to collate the largest MPXV  
68 dataset from Africa to date.<sup>12</sup>

## 69 70 **Results**

### 71 **Ongoing mpox cases in Cameroon are driven by** 72 **zoonotic transmission of newly identified Clade IIb.1**

73  
74 In 2022, Cameroon saw a large increase in mpox cases.<sup>7</sup> It is unclear whether the  
75 reported increase was driven by enhanced surveillance attributable to the global B.1  
76 outbreak, or to increased zoonotic transmission or cryptic sustained human-to-human  
77 transmission as observed in Nigeria.<sup>7</sup> Towards understanding this, we generated 10 new  
78 sequences from samples collected from 2018 to 2022 in Cameroon. All 10 of our  
79 sequences were identified as Clade IIb. The majority of our Cameroonian sequences  
80 were sampled from the rural South-West and North-West regions that border Nigeria  
81 (Figure 1A). The South-West and North-West regions account for the second and third  
82 highest number of mpox cases in Cameroon after the Centre region, where Clade I  
83 predominantly circulates.<sup>7</sup> We also included four Clade IIb genomes sampled from

84 Nigeria from 2022 to 2023 as part of a complementary study from our consortium (Figure  
85 1A).<sup>12</sup> Our four Nigerian sequences were sampled from states that border Cameroon,  
86 namely Abia and Akwa Ibom (Figure 1A).

87  
88 To understand the relationship of our sequences to the human epidemic in Nigeria, we  
89 reconstructed the Clade IIb phylogeny (Figure 1B). We found that all ten Cameroonian  
90 sequences form a divergent basal sister lineage to hMPXV-1 and its zoonotic outgroup,  
91 the oldest zoonotic sequence sampled in Nigeria in 1971 (KJ642617) (Figure 1B). We  
92 term this divergent zoonotic lineage Clade IIb.1, and lineage encompassing zoonotic  
93 outgroup KJ642617 and hMPXV-1 as Clade IIb.2 (Figure 1B).

94  
95 To investigate whether the sampled cases in Cameroon were a result of sustained  
96 human-to-human transmission or zoonotic infection, we investigated the APOBEC3  
97 mutational bias characteristic of sustained human transmission in our sequences.<sup>10,17,18</sup>  
98 We reconstructed all single nucleotide polymorphisms (SNPs) across our Clade IIb  
99 phylogeny. We mapped mutations to their applicable branches, and quantified the  
100 proportion of APOBEC3 mutations (C→T or G→A in the correct dimer context) across the  
101 branches of Clade IIb (Figure 1B, C). We found that only 7 of the 124 SNPs (5.7%) on  
102 the internal branches of Clade IIb excluding hMPXV-1 were consistent with APOBEC3  
103 editing (Figure 1C). This strongly suggests that all of the Clade IIb.1 cases sampled in  
104 Cameroon are the result of zoonotic transmission (Figure 1C). Taken together, it suggests  
105 that ongoing cases in Cameroon are driven by continued zoonotic events by the newly

106 identified Clade IIb.1, not sustained human-to-human transmission as observed in  
107 Nigeria.<sup>7,10,12</sup>

108

109 However, we did find likely cases of secondary human transmission in Cameroon. Two  
110 cases (22V-08501 and 22V-08503) represented a likely household transmission between  
111 a parent and their child from the Bangem health district in the South-West region (Figure  
112 1A, B). The parent reported contact with and consumption of wild game meat. These two  
113 sequences are most closely related to 18V-04552, which represents the first confirmed  
114 case in the 2018 outbreak from Njikwa in the North-West region.<sup>9</sup> The patient had no  
115 reported contact with wild animals or an mpox-like case, and no travel history to Nigeria.

116 There were another two sequences that were identical after masking the alignment (see  
117 Methods), but with uncertain epidemiological linkage. One was a driver (22V-07911) who  
118 reported symptom onset in the South-West locality of Tombel, but sought care in the  
119 Littoral region (Figure 1A). The patient reported no other travel history, no contact with  
120 symptomatic mpox cases, and no contact with wild animals. The second case was an  
121 infant in Nkwen, North-West Region (22V-09327), who had been infected through intra-  
122 familial transmission from their sibling (not sampled). There were two other cases that  
123 were respectively separated by one and two SNPs from the driver and infant. The first  
124 (22V-09403) was the nurse at a hospital in the North-West region who cared for the infant  
125 (22V-09327). The second (22V-07968) case was a community health worker in Tombel  
126 in the South-West, who reported contact with a bike-rider presenting Mpox-like rashes.  
127 The two cases from Tombel had no confirmed contact.

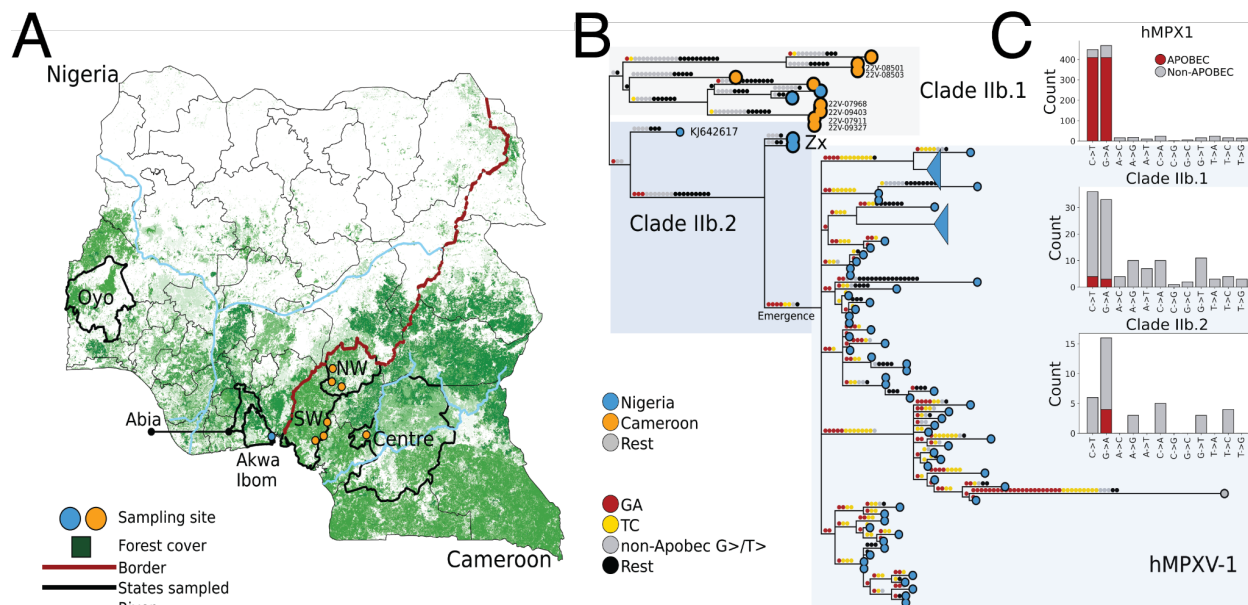

128

129 **Figure 1: A)** Map of Nigeria and Cameroon showcasing the ecological setting of zoonotic MPXV in Nigeria and  
 130 Cameroon. The forest cover, including the discontinuous cross-border forest belt referenced in the text, are highlighted  
 131 in green. The border between Nigeria and Cameroon is annotated in deep red, with the Rivers Niger in Nigeria and  
 132 Sanaga in Cameroon highlighted in light blue. Our sampling sites across the border are annotated in orange and blue  
 133 respectively for Cameroon and Nigeria, and states of interest annotated with highlighted borders. **B)** Reconstructed  
 134 SNPs mapped onto the branches of the Clade IIb phylogeny. APOBEC3 mutations are annotated in yellow and red,  
 135 with non-APOBEC3 mutations in gray and black. The novel lineage sampled from Cameroon and Akwa Ibom in Nigeria  
 136 named Clade IIb.1, is highlighted in the gray box and annotated. Our new zoonotic outgroup from Abia is annotated as  
 137 “Zx”, and forms part of Clade IIb.2 which is annotated in the darker blue box. Lineage A, representing the sustained  
 138 human epidemic in Nigeria, is highlighted in the light blue box as hMPXV-1. **C)** The number of APOBEC3 SNPs out of  
 139 all mutations for the novel zoonotic lineage Clade IIb.1, the hMPXV-1 subtree (highlighted and annotated in Figure B)  
 140 and the Zoonotic subtree of Clade IIb.2 (KJ642617 and Zx annotated in Figure B).  
 141

## 142 Clade IIb zoonotic lineages circulate across the 143 Nigeria-Cameroon border

144 The Nigeria-Cameroon border is covered by a complex forest belt extending into both  
 145 countries that hosts many animal populations susceptible to MPXV infection (Figure  
 146 1A).<sup>15,16</sup> There is also a lot of trans-border human movement, potentially driving viral  
 147 spread between the two countries.<sup>9</sup> To better understand viral spread across the Nigeria-  
 148 Cameroon border, including from animal populations that may freely move across border  
 149 i.e. a shared host reservoir, we particularly included four sequences from Abia and Akwa  
 150 Ibom in southern Nigeria that was not part of the ongoing hMPXV-1 epidemic in Nigeria.<sup>12</sup>

151 All save one of our Cameroon sequences were sampled from the rural areas in the  
152 North-West and South-West regions that border southern Nigeria (Figure 1A).

153  
154 In our phylogeny, we found that the two sequences from Akwa Ibom in southern Nigeria  
155 cluster in the newly identified Clade IIb.1 with the sequences from Cameroon (Figure 1B).

156 The sequences from Akwa Ibom showed no evidence of APOBEC3 editing, indicating  
157 they were a result of zoonotic infection as well (Figure 1 B, C).<sup>10,11</sup> They represented

158 independent spillover events from a shared animal population, as the sequences were  
159 separated by 10 SNPs and the cases were reported from different local government areas

160 (Figure 1B). The Akwa Ibom sequences were most closely related to a sequence (22V-  
161 07739) we sampled in Mbongue in the South-West region of Cameroon (Figure 1A). Akwa

162 Ibom is a state in southern Nigeria adjacent to Cross River state, which shares a forested  
163 border with the regions in Cameroon from where our cases were sampled (Figure 1A).

164 The two Akwa Ibom sequences and the one from Mbongue were very divergent from one  
165 another, separated by 25 and 29 SNPs respectively. The sequence 22V-07739 was

166 sampled from a farmer who reported contact with only bats, with no history of travel or  
167 exposure to mpox cases in the community. Taken together, this supports that in both

168 Nigeria and Cameroon Clade IIb.1 predominantly represents independent zoonotic  
169 transmissions from a diverse viral population that has diverged over time in a shared

170 animal reservoir in the the cross-border forest ecosystems of southern Nigeria and  
171 Western Cameroon.

172  
173 The single Clade IIb.1 sequence (21V-04877) we sampled from the Centre region of  
174 Cameroon, which is normally predominated by Clade I, was from an internally displaced



175 person (IDP). Epidemiological data confirms that the IDP was from the North-West, and  
176 was likely infected in the Littoral region where the patient was residing at time of disease  
177 onset before being referred to a health facility in the Centre region.

178  
179 In light of the high divergence observed between Clade IIb.1 and Clade IIb.2 (Figure 1B),  
180 we next investigated how long Clade IIb has been circulating in the cross-border animal  
181 population. We performed Bayesian phylogenetic reconstructions under the two-epoch  
182 model of O'Toole *et al.* implemented in BEAST, combining our sequences with the  
183 dataset we produced from the Nigerian epidemic.<sup>10,12</sup> We found that Clade IIb.1 diverged  
184 from Clade IIb.2 around six decades ago in the animal reservoir (Figure 2). The common  
185 ancestor of Clade IIb.1 and Clade IIb.2 circulated in January 1966 (median time to the  
186 most recent common ancestor or tMRCA, 95% HPD October 1962 to December 1968).  
187 There is also evidence of more recent cross-border viral spread in Clade IIb.1, as the  
188 Akwa Ibom sequences diverged from the Mbongue sequence in March of 2009 (tMRCA,  
189 95% HPD November 2004 to August 2013). Sparse sampling limits our ability to  
190 definitively resolve the geographic origin of the common ancestor of all of Clade IIb  
191 (Figure 2). However, the country of origin and direction of spread is less meaningful for a  
192 virus in an animal population in a cross-border ecosystem. Taken together, our Clade IIb  
193 sequences support both recent and historic viral spread across a porous Nigeria-  
194 Cameroon border, likely originating in a shared animal population hosting significant  
195 diversity in the cross-border forest ecosystem.

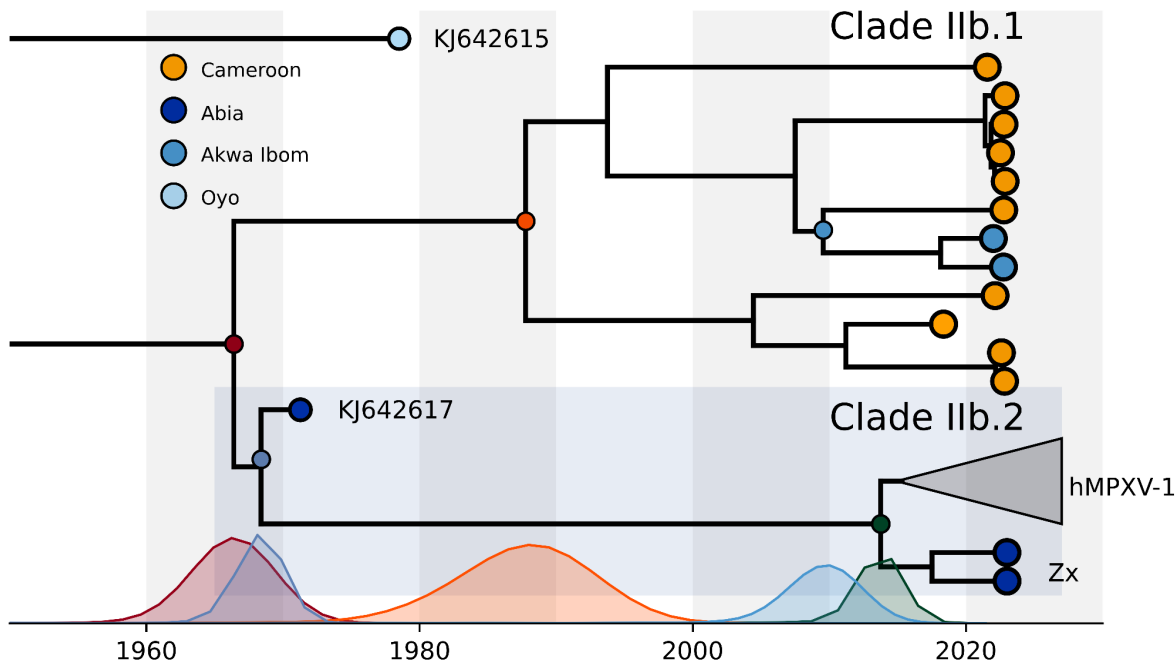

196

197 **Figure 2:** The time-resolved phylogeny of Clade IIb. hMPXV-1, representing the human epidemic in Nigeria, is  
198 collapsed. Our new zoonotic outgroup from Abia is annotated as “Zx”, with Clade IIb.2 annotated in the dark blue box.  
199 Clade IIb.1 is annotated in text. Distributions on the x-axis represent the tMRCA of the color matching node.

200

## 201 **Zoonotic ancestor of hMPXV-1 circulated in southern** 202 **Nigeria in late 2013**

203 Before this study, the closest zoonotic outgroup to hMPXV-1 (KJ642617) was sampled in  
204 1971 in Abia province in southern Nigeria (Figure 1A, 2A). This suggests that the  
205 precursor lineage of hMPXV-1 may have circulated in the animal population in the cross-  
206 border forest belt in the south. To determine whether we’ve sampled a closer zoonotic  
207 outgroup to hMPXV-1 from this precursor lineage, we investigated the relationship of our  
208 four zoonotic sequences from Nigeria to hMPXV-1.

209

210 In our Clade IIb phylogeny, we found that two sequences of our sequences from Abia in  
211 southern Nigeria formed a more recent Clade IIb.2 outgroup to hMPXV-1 than KJ642617  
212 (“Zx” in Figure 1B).<sup>12</sup> There was no evidence of APOBEC3 mutational bias in the Abia

213 sequences, indicating they represented zoonotic infections (Figure 1 B,C). We refer to  
214 our new outgroup sequences as the zoonotic outgroup hereafter (“Zx” in Figure 1-2). As  
215 the zoonotic outgroup shares a common ancestor with hMPXV-1, they represent the  
216 closest sequences to the zoonotic precursor of hMPXV-1 (Figure 1B). The zoonotic  
217 outgroup breaks up the long stem branch from the common ancestor of KJ642617 and  
218 hMPXV-1, reducing it from 27 to 8 SNPs (Figure 1B). The two sequences are separated  
219 by 8 non-APOBEC3 SNPs, signifying they represent independent zoonotic transmissions  
220 (Figure 1B). The zoonotic Clade IIb.2 from Abia, including the new outgroup and  
221 KJ642617, is phylogenetically distinct from Clade IIb.1 circulating in Akwa Ibom and  
222 Cameroon. This indicates that we’ve sampled two distinct zoonotic lineages in the regions  
223 in proximity to the Nigeria-Cameroon border (Figure 1A, B). Notably, Abia is a neighboring  
224 state to Akwa Ibom and Cross River state, which borders Cameroon and shares the  
225 contiguous forest belt that likely hosts the shared animal population that drove the cross-  
226 border dissemination of Clade IIb.1 (Figure 1A).

227  
228 The recent divergence between our new zoonotic outgroup and hMPXV-1 places a tight  
229 bound on when the zoonotic ancestor of hMPXV-1 was circulating in an animal population  
230 in the region. In our Bayesian phylogenetic reconstructions, we estimated that the  
231 outgroup shared a common ancestor with hMPXV-1 that circulated in November 2013  
232 (95%HPD April 2012 - April 2015) (Figure 2). In a complementary study, we used the  
233 additional phylogenetic information of the outgroup to estimate that hMPXV-1 initially  
234 emerged in humans July 2014 (95% HPD 6 October 2013 - 23 February 2015).<sup>12</sup> This  
235 suggests that the ancestor of hMPXV-1 circulated in animals in Abia or southern Nigeria  
236 for less than a year before emergence, though credible intervals overlap. This is

237 consistent with our complimentary work that found that hMPXV-1 most likely originated in  
238 Rivers State in Nigeria, which borders Abia.<sup>12</sup> It is also consistent with the epidemiological  
239 data, which shows that the southern states were the epicenter of the early stages of the  
240 Nigerian mpox epidemic.<sup>12</sup>

241  
242 Both the new zoonotic outgroup and KJ642617 (sampled in 1971) from Clade IIb.2 were  
243 sampled in Abia state. This suggests that the zoonotic lineage from which hMPXV-1  
244 descended may have persistently circulated in the animal reservoir in southern Nigeria  
245 for decades. In our Bayesian phylogenetic analysis, we found that the Zx zoonotic  
246 outgroup diverged from the older zoonotic KJ642617 around March 1968 (95%HPD  
247 December 1965 - February 1970) (Figure 2). This suggests that the hMPXV-1 precursor  
248 lineage circulated in an animal population in Abia or southern Nigeria for at least 45 years.

## 249 **The zoonotic evolutionary rate is 20-50 times lower** 250 **than the APOBEC3-mediated rate in humans**

251 In our previous work under a partitioned epoch model, we found that APOBEC3 activity  
252 increased the evolutionary rate of hMPXV-1 20-fold across sustained human  
253 transmission.<sup>12</sup> To compare the evolutionary rates from the human epidemic to the rate  
254 in animals, where APOBEC3-mediated evolution is absent, we estimated the rate for the  
255 novel zoonotic Clade IIb.1, and the zoonotic Clade IIa combined (Figure 3A). We  
256 performed model selection to compare four clock models: the strict clock, the uncorrelated  
257 relaxed clock with a lognormal (UCL) and gamma (UCG) distribution respectively and the  
258 fixed local clock (FLC), allowing the two clades to evolve at different rates.<sup>19,20</sup> Model  
259 testing showed strong positive support for a FLC over the UCG (Bayes Factor - BF - 177),  
260 strict clock (BF 189) and the UCL (BF 204) (Extended Data table 1).

261  
262 Under the FLC model, we estimated an evolutionary rate of  $4.3 \times 10^{-6}$  (95% HPD  $3.1 \times 10^{-6}$   
263  $- 5.6 \times 10^{-6}$ ) for Clade IIa, and  $2 \times 10^{-6}$  (95% HPD  $1.5 \times 10^{-6} - 2.6 \times 10^{-6}$ ) for zoonotic Clade  
264 IIb (Figure 3B). The background rate estimated for Clade IIb hMPXV-1 i.e. the human  
265 epidemic  $4.8 \times 10^{-6}$  (95% HPD  $4.2 \times 10^{-6} - 5.5 \times 10^{-6}$ ) is consistent with our Clade IIa rate.<sup>12</sup>  
266 These rates translate to 1-2 substitutions a year. However, our zoonotic Clade IIb rate is  
267 slower than the background rate estimated for hMPXV-1 and the rate of Clade IIa,  
268 equating to  $\sim 1$  substitution every 2-3 years. The Clade IIb zoonotic rate is consistent with  
269 the rate previously estimated by Patrono *et al.* for a Clade IIa outbreak in chimpanzees,  
270 and marginally higher than the rate estimate for zoonotic Clade I.<sup>21,22</sup> All of our non-  
271 APOBEC3 rates are within the expectation of double-stranded DNA viruses, but are lower  
272 than the rates estimated for smallpox.<sup>23-25</sup> The relatively lower Clade IIb zoonotic rate  
273 indicates that there was no elevation in the evolutionary rate in non-human animals before  
274 emergence. Most notably, the APOBEC3 rate estimated from the human epidemic ( $1 \times 10^{-}$   
275  $4$  (95% HPD  $8.8 \times 10^{-5} - 1.14 \times 10^{-4}$ ) is approximately 20-50 times higher than the  
276 evolutionary rate estimated from non-human animals.<sup>12</sup> Our results were consistent  
277 across all clock models (Extended Data Figure 1).

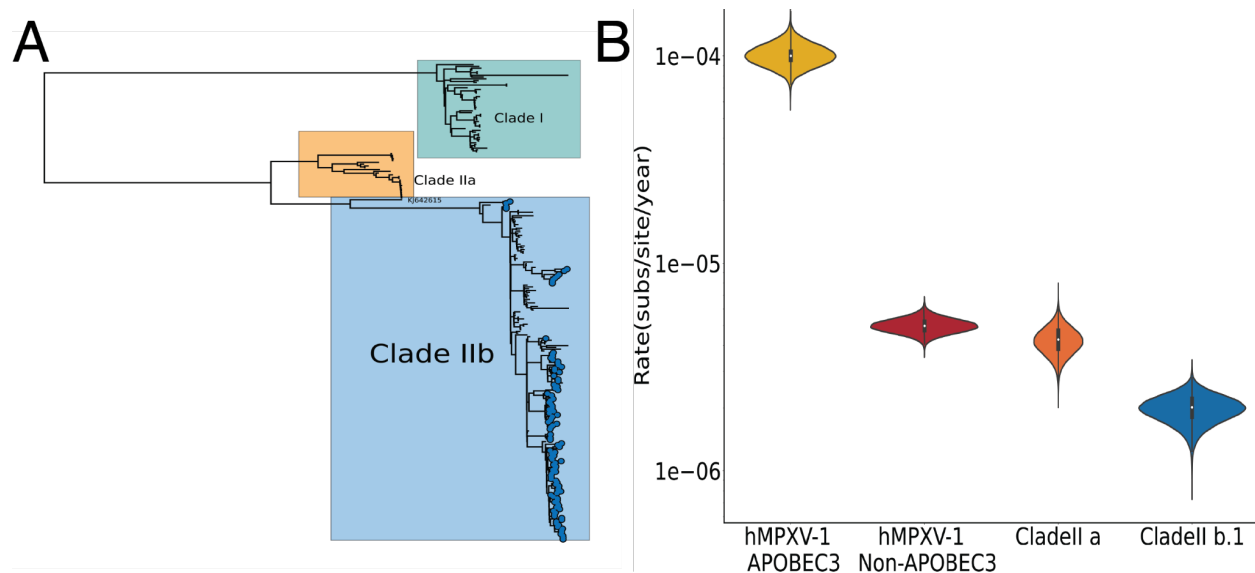

278

279 **Figure 3: A)** Global MPXV phylogeny of Clade I, Clade IIa and Clade IIb. Our Clade IIb sequences are annotated as  
280 tip points **B)** Comparison of the evolutionary rate of the hMPXV-1 APOBEC3, hMPXV-1 Non-APOBEC3, Zoonotic  
281 Clade IIa and Zoonotic Clade IIb.1 under the two-epoch partitioned model the local clock model (Clade IIa, Clade IIb.1)  
282 respectively.  
283

## 284 Discussion

285 The ongoing MPXV zoonotic transmission events in Cameroon and Nigeria identified in  
286 this study underscores the continuous risk of MPXV emergence and re-emergence, which  
287 is likely still significantly underestimated owing to under-ascertainment of cases and  
288 sparse genomic data. In our Cameroonian dataset, we found that all ten sampled cases  
289 resulted from zoonotic infections or secondary transmission of the novel Clade IIb.1, with  
290 no evidence of sustained human-to-human transmission in Cameroon.<sup>10-12</sup> Combined  
291 with our larger dataset<sup>12</sup>, we found only four of the 112 sequences from Nigeria were  
292 zoonotic in origin, with the remainder part of the ongoing hMPXV-1 human epidemic.<sup>12</sup>  
293 However, our samples only represent 4.2% and 7.5% of all suspected mpox cases in  
294 Nigeria and Cameroon respectively from 2017 onwards. It is likely that enhanced  
295 surveillance in the human population, especially in border-adjacent communities at the  
296 animal-human interface, will reveal more zoonotic transmission events.

297  
298 In this study, all of our Cameroonian sequences were sampled from individuals living in  
299 rural areas in the South-West and North-West regions, whereas our sequences from  
300 Nigeria were sampled in the southern states of Akwa Ibom and Abia. The North-West and  
301 South-West of Cameroon is dominated by the Cameroonian Highlands and Guinean  
302 Lower forest ecosystems, which extends into southern Nigeria.<sup>15</sup> These cross-border  
303 forest ecosystems are areas of high biodiversity, hosting a wide range of potential hosts  
304 susceptible to MPXV. The precise animal reservoir for MPXV currently remains unknown.  
305 However, various small mammals, primarily squirrel and other rodent species, have  
306 shown serological or viral evidence of infection.<sup>13,26–30</sup> It is likely that a diverse group of  
307 squirrel and rodent species maintain the reservoir, while non-human primates and other  
308 species act as intermediate hosts.<sup>31</sup> Our findings support that the cross-border forest  
309 ecosystems likely hosts the shared reservoir driving cross-border viral dispersal, where  
310 Clade IIb likely originated. In light of this, we need improved surveillance in the wildlife  
311 population in the forest systems along the Nigeria-Cameroon border to better understand  
312 the transmission and maintenance of MPXV in animal hosts. Additional sampling is likely  
313 to reveal significant unsampled viral diversity in the reservoir, as observed in the deep  
314 divergences just in the sampled tree.

315  
316 The factors that drove hMPXV-1's recent emergence in the human population are still  
317 unclear. Previous studies have established that hMPXV-1 resulted from a single zoonotic  
318 event.<sup>10,12</sup> Most spillover events result in sporadic human cases or stuttering transmission  
319 chains that largely go unobserved without establishing substantial human-to-human  
320 transmission.<sup>32,33</sup> It remains unclear why this zoonotic event successfully established

321 sustained transmission. There are a few factors that may have contributed to MPXV's  
322 recent emergence.

323

#### 324 *Declining herd immunity from smallpox vaccination*

325 Vaccination against fellow *Orthopoxvirus* smallpox offers some degree of cross-  
326 protection against MPXV.<sup>34,35</sup> In Africa, large scale smallpox vaccination campaigns  
327 stopped in the early 1980s after global eradication in 1977.<sup>36</sup> As a result, herd immunity  
328 has significantly declined over recent decades and the population of susceptibles have  
329 concurrently increased. This is particularly relevant to African countries, where the  
330 median age is below 18 years.<sup>37</sup> A lack of protective immunity not only increases the  
331 chances of a successful zoonotic infection, but also increases the probability of onward  
332 transmission after the initial zoonotic event.<sup>35,36</sup>

333

#### 334 *Increased exposure at the animal-human interface*

335 Humans are exposed to potentially infected MPXV hosts at the human-animal interface  
336 through various activities, with exposure increasing in recent years. Crucially, wild game  
337 consumption is common for subsistence in many regions of Africa, with many of the  
338 commonly targeted mammalian species susceptible to MPXV infection.<sup>13,38,39</sup> The rising  
339 demand for wild game meat, along with population growth, socioeconomic conditions,  
340 and internal displacement has led to greater exposure through increased hunting,  
341 consumption, and trade.<sup>36,40</sup> Notably, the Nigeria-Cameroon forest belt hosts a substantial  
342 amount of hunting and wild game trade due to its rich species abundance and diversity.<sup>41</sup>  
343 Trade of shared animal sources or shared markets may facilitate cross-border  
344 transmission.<sup>42,43</sup> The North-West and South-West of Cameroon have been severely



345 affected by conflict since 2017, resulting in large-scale internal displacement and  
346 increased movements to the neighboring countries including Nigeria.<sup>7</sup> This large-scale  
347 and undocumented trans-border human movement may drive viral introductions to new  
348 populations. Many IDPs have been forced to settle in forested areas to escape conflict,  
349 resulting in increased exposure for an already vulnerable community.<sup>44</sup> Two of our  
350 sampled cases were IDPs, including the farmer who reported leaving the South-West five  
351 years ago. The patient reported that approximately 10 000 other people left their villages  
352 and homes due to the social unrest to live in the same settlement area in the bush.  
353 Additionally, ecosystems have been disrupted by land use intensification, including  
354 deforestation, expanding agriculture and urbanization.<sup>7,15,36,45</sup>

355

#### 356 *Initial zoonotic transmission in a mobile, connected subpopulation*

357 Heterogeneities in the basic reproductive number, particularly superspreading dynamics,  
358 are strong determinants of emergence and early epidemic spread.<sup>46</sup> MPXV's emergence  
359 and successful onward transmission was most likely driven by an initial zoonotic  
360 transmission within a connected, mobile subpopulation, where subsequent transmission  
361 was more probable owing to behavioral and demographic factors driving rapid  
362 dissemination.<sup>47,48</sup> Our previous work supports that hMPXV-1 still only circulates in a  
363 restricted subpopulation in Nigeria.<sup>12</sup> Our previous findings also strongly suggest that  
364 these early events occurred in a subpopulation in southern Nigeria.<sup>12</sup>

365

#### 366 *Viral adaptation in the natural reservoir or in humans following zoonotic transmission*

367 We think it's unlikely that adaptation in the natural reservoir drove emergence. The two  
368 non-synonymous non-APOBEC3 substitutions along the stembranch to hMPXV-1 from

369 our close zoonotic outgroup are both relatively conservative. However, it is not possible  
370 to infer that any of the stem or deeper branch substitutions in the tree did not confer an  
371 advantage for human infection and transmission without experimental characterization. It  
372 is also possible that MPXV's emergence was facilitated by adaptation in the human  
373 population after the initial zoonotic transmission. However, prior work showed that the set  
374 of nucleotide and amino acid substitutions accessible by APOBEC3 activity is restricted.<sup>10</sup>  
375 This may constrain viral adaptation, as substitution options at non-deleterious target sites  
376 become saturated over time. However, adaptation is more probable across extended  
377 chains of transmission, driven by founder effects and selection.<sup>10,49</sup> Potentially adaptive  
378 changes have been observed in later descendants of the hMPXV-1 Lineage A, including  
379 disruption of immunomodulatory genes.<sup>11,12</sup> However, these changes occurred after  
380 prolonged circulation in the human population. We have estimated that MPXV circulated  
381 cryptically in the human population in Nigeria for approximately three years before  
382 detection.<sup>12</sup> Nonetheless, we find it unlikely that any of the early substitutions in the  
383 human epidemic facilitated sustained transmission. Of the earliest six APOBEC3  
384 mutations that occurred in the human population, only two are non-synonymous. Without  
385 experimental characterization, we cannot conclude that any of the early substitutions did  
386 not confer an adaptive advantage that facilitated transmission after the initial zoonotic  
387 transmission. However, we consider this scenario improbable.

388

## 389 **Methods**

### 390 **Ethics declaration**

391 No ethical approval was required for this study as it is based on collecting data from  
392 Cameroon's national surveillance program, for which Centre Pasteur du Cameroun (CPC)  
393 is the National Reference Laboratory (NRL). The surveillance program includes genomic  
394 surveillance as provided in this study to inform public health preparedness. Under the  
395 program, Individual written or oral informed consent was obtained from all mpox  
396 suspected cases after detailed information and explanations of the sampling purpose  
397 were provided. Informed consent for children was obtained from their parents or  
398 recognized guardians. All samples from Nigeria were similarly collected during national  
399 outbreak surveillance by the Nigerian CDC. Under the surveillance program, individual  
400 written or oral informed consent was obtained as detailed above.

### 401 **Sampling**

402 From 2018 to 2022, a total of 28 human mpox cases were identified by the national  
403 surveillance program in Cameroon. Suspected cases were identified by community health  
404 workers (CHWs) or clinicians and samples collected by a Rapid Response and  
405 Investigation Team (RRIT) equipped with appropriate personal protective equipment  
406 (PPE) under the guidance of Regional Centers for Epidemic Prevention and Control  
407 (CERPLE) and following the national guidelines for surveillance and response to mpox  
408 outlined by the the Department for the Control of Disease, Epidemics and Pandemics  
409 (DLMEP) of the Cameroonian MoH. Cases were confirmed by standard and genotyping  
410 real-time PCR at the CPC which host the NRL for mpox in Cameroon.<sup>7</sup> From the total

411 cases, we selected ten for sequencing based on Clade genotyping by rtPCR, cycle  
412 threshold (value < 30) and sample availability. Samples were screened for DNA  
413 concentration and quality (total DNA >500 ng and absorbance ratio >1.8 260/230 and  
414 260/280). Samples represented maculopapular vesicles, skin crust or blood samples.  
415 The four Nigerian sequences are from a complementary study.<sup>12</sup> For this dataset,  
416 samples were collected by laboratory personnel and Local Government Area (LGA)  
417 Disease Surveillance and Notification Officers (DSNOs) equipped with appropriate  
418 personal protective equipment (PPE), adhering to the guidelines outlined in the Nigeria  
419 Centre for Disease Control and Prevention (NCDC) National Monkeypox Public Health  
420 Response Guidelines.<sup>50</sup> Samples from both sites comprised: swabs from the exudate of  
421 vesicular or pustular lesions, lesion crusts obtained during the acute rash phase, whole  
422 blood collected in ethylenediaminetetraacetic acid (EDTA) or plain/non-anticoagulated  
423 tubes. All samples were labeled with case information and stored at 2-8°C during  
424 transport to either the NCDC NRL (Gaduwa-Abuja) or the Central Public Health  
425 Laboratory (Yaba-Lagos) for Nigeria, and the NRL at CPC in Cameroon (Yaounde). On  
426 arrival, the crusts and swabs were eluted, while the serum/plasma was separated from  
427 the red cells. Subsequently, these components were stored at ultralow temperatures of  
428  $\leq -70^{\circ}\text{C}$  at the NCDC and CPC biorepositories.

## 429 **Sequencing**

430 Enrichment bead-linked transposomes were used to tagment the extracted DNA and  
431 enriched using the Illumina- rna -prep enrichment with the VSP panel. Libraries were  
432 quantified using dsDNA BR Assay, normalized to a concentration of 0.6nM and  
433 sequenced on the Illumina NovaSeq 6000 platform with a read length of 151 base pair

434 paired end at the African Centre of Excellence for Genomics of Infectious Diseases  
435 (ACEGID), based at Redeemer's University, Ede, Nigeria.

## 436 **Genome assembly**

437 We performed the initial assembly *de novo* with the viral-ngs pipeline. We subsequently  
438 performed reference based assembly with an in-house pipeline.<sup>51</sup> We mapped reads  
439 against a Clade IIb reference genome (NC\_063383) with *bwa-mem*<sup>52</sup>, and called  
440 consensus using samtools<sup>53</sup> and iVar.<sup>54</sup>

## 441 **Genomic dataset curation**

442 We combined our 10 sequences from Cameroon with four zoonotic sequences from  
443 Nigeria identified as part of a larger study.<sup>12</sup> We combined these 14 sequences with our  
444 109 sequences reported elsewhere, and all available Clade IIb MPXV genomes of high  
445 quality from Genbank.<sup>12</sup> We included a single sequence representing the global B.1  
446 outbreak, as it was not our focus. In total, our dataset consists of 202 sequences.

## 447 **Phylogenetic Analysis**

448 We used the 'squirrel' package (<https://github.com/aineniamh/squirrel>) developed by  
449 O'Toole *et al.* (2022) to align our sequences to the Clade IIb reference genome  
450 (NC\_063383), which represents an early hMPXV-1 sequence. We trimmed the alignment,  
451 and masked repeat regions or regions of low complexity. We reconstructed the Clade IIb  
452 phylogeny with IQ-TREE v2.0, under the Jukes-Cantor substitution model.<sup>55</sup> We rooted  
453 the tree to KJ642615, a zoonotic sequence sampled in Nigeria in 1978, as it is notably  
454 divergent from the remaining Clade IIb diversity and collapsed all zero branch lengths.  
455 We performed ancestral state reconstruction across the Clade IIb phylogeny with IQ-  
456 TREE2.<sup>55</sup> We mapped all of the nucleotide mutations that occurred unambiguously

457 across the phylogeny to internal branches. Additionally, we cataloged the dimer genomic  
458 context of all C→T or G→A mutation, as described by O’Toole *et al.*<sup>8</sup> We classified our  
459 sequences into lineages under the nomenclature developed in Happi *et al.*<sup>14</sup> using  
460 Nextclade.<sup>56</sup>

## 461 **Modeling APOBEC3-mediated evolution**

462 We adopted a similar approach to the Bayesian phylogenetic analyses as described in  
463 O’Toole *et al.*<sup>10</sup> using the BEAST 1.10<sup>57</sup> platform powered through the BEAGLE high-  
464 performance computing library.<sup>58</sup> Briefly, we partitioned the Clade IIb alignment into two  
465 partitions representing 1) sites with potential APOBEC3 modifications (specifically C→T  
466 and G→A substitutions in the dimer context TC and GA) together with fully conserved C  
467 and G target sites, with all other sites masked, and 2) sites with the APOBEC3 target sites  
468 masked inversely. The APOBEC3 partition was 24 680 unmasked sites, whereas the non-  
469 APOBEC3 partition was 172 529 sites. We used the GTR+G substitution model with four  
470 rate categories for the non-APOBEC partition. For the APOBEC partition, we used a  
471 substitution model where the nucleotides are characterized as modified (T) and  
472 unmodified (C). We use a two-state continuous-time Markov chain with an asymmetric  
473 rate to permit C→T mutations but not the reverse.

474  
475 In the two-epoch mode, we allow the evolutionary rate to shift from the background rate  
476 (driven by the polymerase error rate) to the APOBEC3 rate at a specific time point for the  
477 APOBEC3 partition. We incorporated a local clock to scale the mutation proportion  
478 attributed to APOBEC3 activity across the branches up to the transition time. We allowed  
479 the non-APOBEC3 partition to evolve under the background evolutionary rate across the  
480 entire phylogeny.<sup>12</sup> We used a two-phase coalescent model, where the tree from the

481 MRCA of hMPXV-1 onward was modeled with an exponential growth model, and the  
482 earlier phase was modeled as a constant-population size coalescent model. For each  
483 model, we ran two independent chains of 100 million states to ensure convergence,  
484 discarding the initial 10% of each chain as burn-in. The chains were then combined with  
485 LogCombiner. For all subsequent analyses, we assessed convergence using Tracer, and  
486 constructed a maximum clade credibility (MCC) tree in TreeAnnotator 1.10.<sup>59</sup>

## 487 **Estimating the evolutionary rate of Clade IIa and Clade** 488 **IIb zoonotic sequences**

489 We estimated the evolutionary rates of the zoonotic Clade IIa and Clade IIb using the  
490 BEAST 1.10 software.<sup>57</sup> We modeled the substitution process under a GTR+G model.<sup>60</sup>  
491 We employed three different models: the strict clock; a fixed local clock that constrained  
492 Clade IIa and Clade IIb into respective monophyletic clades with different evolutionary  
493 rates; the uncorrelated relaxed clock with a lognormal distribution (UCL).<sup>19,61,62</sup> For each  
494 of the models we employed both the noninformative continuous time markov chain  
495 (CTMC) prior on the overall rate scalar which is a default in BEAST1.10.5 and then used  
496 an overall rate  $10^{-6}$  for pox viruses<sup>20, 22, 23</sup> with gamma distribution that imposes a stronger  
497 penalty for the rates than the default prior.<sup>63</sup> Both prior produced similar results. We ran  
498 two independent MCMC chains of 50 million states, sampling every 1000 states and  
499 combining post burn-in samples (10% burn-in). We assessed convergence using Tracer,  
500 ensuring that all effective sample sizes were above 200.<sup>59</sup> To perform model selection,  
501 we inferred the log marginal likelihood using the generalized stepping-stone sampling  
502 (GSS).<sup>64,65</sup> We excluded the KJ642615 sequence sampled in 1978 from Nigeria as it is

503 significantly divergent from the remaining Clade IIb. We only included one sequence of  
504 the four sequences from the 2018 Chimpanzee outbreak in Cote d'Ivoire.<sup>20, 22, 24</sup>

## 505 **Geographic data**

506 All shapes files were obtained from the FAO geoNetwork ([https://www.fao.org/land-  
507 water/databases-and-software/geonetwork/en/](https://www.fao.org/land-water/databases-and-software/geonetwork/en/))

## 508 **Data availability**

509 All sequences are available on Genbank under Accession numbers PP860025-  
510 PP860033. All other data are available at [https://github.com/andersen-  
511 lab/MPXV\\_zoonotic\\_transmission\\_West\\_Africa](https://github.com/andersen-lab/MPXV_zoonotic_transmission_West_Africa), or upon request.

## 512 **Code availability**

513 All code to run the analyses is available in [https://github.com/andersen-  
514 lab/MPXV\\_zoonotic\\_transmission\\_West\\_Africa](https://github.com/andersen-lab/MPXV_zoonotic_transmission_West_Africa)

515

516



## 517 **References**

- 518 1. Nakazawa, Y. *et al.* A phylogeographic investigation of African monkeypox. *Viruses* **7**, 2168–2184  
519 (2015).
- 520 2. Durski, K. N. *et al.* Emergence of monkeypox in West Africa and Central Africa, 1970-  
521 2017/Emergence de l'orthopoxvirose simienne en Afrique de l'Ouest et en Afrique centrale, 1970-  
522 2017. *Weekly Epidemiological Record* **93**, 125–133 (2018).
- 523 3. Breman, J. G. *et al.* Human monkeypox, 1970-79. *Bull. World Health Organ.* **58**, 165–182 (1980).
- 524 4. McCollum, A. M. & Damon, I. K. Human monkeypox. *Clin. Infect. Dis.* **58**, 260–267 (2014).
- 525 5. Yinka-Ogunleye, A. *et al.* Reemergence of Human Monkeypox in Nigeria, 2017. *Emerg. Infect. Dis.* **24**,  
526 1149–1151 (2018).
- 527 6. World Health Organization. Mpox (monkeypox)-Democratic Republic of the Congo. 2023- 11-  
528 23)[2023- 12- 18]. <https://www.who.int>.
- 529 7. Djuicy, D. D. *et al.* Concurrent Clade I and Clade II Monkeypox Virus Circulation, Cameroon, 1979-  
530 2022. *Emerg. Infect. Dis.* **30**, (2024).
- 531 8. Yinka-Ogunleye, A. *et al.* Outbreak of human monkeypox in Nigeria in 2017–18: a clinical and  
532 epidemiological report. *Lancet Infect. Dis.* **19**, 872–879 (2019).
- 533 9. Sadeuh-Mba, S. A. *et al.* Monkeypox virus phylogenetic similarities between a human case detected  
534 in Cameroon in 2018 and the 2017-2018 outbreak in Nigeria. *Infect. Genet. Evol.* **69**, 8–11 (2019).
- 535 10. O'Toole, Á. *et al.* APOBEC3 deaminase editing in mpox virus as evidence for sustained human  
536 transmission since at least 2016. *Science* **382**, 595–600 (2023).
- 537 11. Ndodo, N. *et al.* Distinct monkeypox virus lineages co-circulating in humans before 2022. *Nat. Med.*  
538 **29**, 2317–2324 (2023).
- 539 12. Parker, E *et al.* *Genomic Epidemiology Uncovers the Timing and Origin of the Emergence of Mpox in*  
540 *Humans*. doi:10.5281/zenodo.11652886.
- 541 13. Doty, J. B. *et al.* Assessing Monkeypox Virus Prevalence in Small Mammals at the Human–Animal  
542 Interface in the Democratic Republic of the Congo. *Viruses* **9**, 283 (2017).

- 543 14. Happi, C. *et al.* Urgent need for a non-discriminatory and non-stigmatizing nomenclature for  
544 monkeypox virus. *PLoS Biol.* **20**, e3001769 (2022).
- 545 15. Molua, E.L. and Lambi, C.M. Climate, Hydrology and Water Resources in Cameroon. *Environmental*  
546 *Issues: Problems and Prospects, Bamenda: Unique Printers, 45-66.* (2001).
- 547 16. Reynolds, M. G., Doty, J. B., McCollum, A. M., Olson, V. A. & Nakazawa, Y. Monkeypox re-emergence  
548 in Africa: a call to expand the concept and practice of One Health. *Expert Rev. Anti. Infect. Ther.* **17**,  
549 129–139 (2019).
- 550 17. Isidro, J. *et al.* Phylogenomic characterization and signs of microevolution in the 2022 multi-country  
551 outbreak of monkeypox virus. *Nat. Med.* **28**, 1569–1572 (2022).
- 552 18. Gigante, C. M. *et al.* Multiple lineages of monkeypox virus detected in the United States, 2021-2022.  
553 *Science* **378**, 560–565 (2022).
- 554 19. Drummond, A. J., Ho, S. Y. W., Phillips, M. J. & Rambaut, A. Relaxed phylogenetics and dating with  
555 confidence. *PLoS Biol.* **4**, e88 (2006).
- 556 20. Sinsheimer, J. S., Lake, J. A. & Little, R. J. Bayesian hypothesis testing of four-taxon topologies using  
557 molecular sequence data. *Biometrics* **52**, 193–210 (1996).
- 558 21. Patrono, L. V. *et al.* Monkeypox virus emergence in wild chimpanzees reveals distinct clinical  
559 outcomes and viral diversity. *Nat Microbiol* **5**, 955–965 (2020).
- 560 22. Berthet, N. *et al.* Genomic history of human monkey pox infections in the Central African Republic  
561 between 2001 and 2018. *Sci. Rep.* **11**, 13085 (2021).
- 562 23. Duggan, A. T. *et al.* 17th Century Variola Virus Reveals the Recent History of Smallpox. *Curr. Biol.* **26**,  
563 3407–3412 (2016).
- 564 24. Porter, A. F., Duggan, A. T., Poinar, H. N. & Holmes, E. C. Comment: Characterization of Two Historic  
565 Smallpox Specimens from a Czech Museum. *Viruses* vol. 9 (2017).
- 566 25. Duffy, S., Shackelton, L. A. & Holmes, E. C. Rates of evolutionary change in viruses: patterns and  
567 determinants. *Nat. Rev. Genet.* **9**, 267–276 (2008).
- 568 26. Khodakevich, L., Jezek, Z. & Kinzanzka, K. Isolation of monkeypox virus from wild squirrel infected in  
569 nature. *Lancet* **1**, 98–99 (1986).
- 570 27. Radonić, A. *et al.* Fatal monkeypox in wild-living sooty mangabey, Côte d'Ivoire, 2012. *Emerg. Infect.*

- 571 *Dis.* **20**, 1009–1011 (2014).
- 572 28. Curaudeau, M. *et al.* Identifying the Most Probable Mammal Reservoir Hosts for Monkeypox Virus  
573 Based on Ecological Niche Comparisons. *Viruses* **15**, (2023).
- 574 29. Khodakevich, L., Jezek, Z. & Messinger, D. Monkeypox virus: ecology and public health significance.  
575 *Bull. World Health Organ.* **66**, 747–752 (1988).
- 576 30. Nolen, L. D. *et al.* Introduction of Monkeypox into a Community and Household: Risk Factors and  
577 Zoonotic Reservoirs in the Democratic Republic of the Congo. *Am. J. Trop. Med. Hyg.* **93**, 410–415  
578 (2015).
- 579 31. Breman, J. G., Bernadou, J. & Nakano, J. H. Poxvirus in West African nonhuman primates: serological  
580 survey results. *Bull. World Health Organ.* **55**, 605–612 (1977).
- 581 32. Pekar, J. E. *et al.* The molecular epidemiology of multiple zoonotic origins of SARS-CoV-2. *Science*  
582 **377**, 960–966 (2022).
- 583 33. Glennon, E. E., Jephcott, F. L., Restif, O. & Wood, J. L. N. Estimating undetected Ebola spillovers. *PLoS*  
584 *Negl. Trop. Dis.* **13**, e0007428 (2019).
- 585 34. Titanji, B. K. *et al.* Effectiveness of Smallpox Vaccination to Prevent Mpox in Military Personnel. *N.*  
586 *Engl. J. Med.* **389**, 1147–1148 (2023).
- 587 35. Fine, P. E., Jezek, Z., Grab, B. & Dixon, H. The transmission potential of monkeypox virus in human  
588 populations. *Int. J. Epidemiol.* **17**, 643–650 (1988).
- 589 36. Rimoin, A. W. *et al.* Major increase in human monkeypox incidence 30 years after smallpox  
590 vaccination campaigns cease in the Democratic Republic of Congo. *Proc. Natl. Acad. Sci. U. S. A.* **107**,  
591 16262–16267 (2010).
- 592 37. Median age (years). *WHO Data* [https://platform.who.int/data/maternal-newborn-child-adolescent-](https://platform.who.int/data/maternal-newborn-child-adolescent-ageing/indicator-explorer-new/MCA/median-age-(years))  
593 [ageing/indicator-explorer-new/MCA/median-age-\(years\)](https://platform.who.int/data/maternal-newborn-child-adolescent-ageing/indicator-explorer-new/MCA/median-age-(years)).
- 594 38. Fa, J. E., Ryan, S. F. & Bell, D. J. Hunting vulnerability, ecological characteristics and harvest rates of  
595 bushmeat species in afrotropical forests. *Biol. Conserv.* **121**, 167–176 (2005).
- 596 39. Silva, N. I. O., de Oliveira, J. S., Kroon, E. G., Trindade, G. de S. & Drumond, B. P. Here, There, and  
597 Everywhere: The Wide Host Range and Geographic Distribution of Zoonotic Orthopoxviruses. *Viruses*  
598 **13**, (2020).

- 599 40. Effiom, E. O., Nuñez-Iturri, G., Smith, H. G., Ottosson, U. & Olsson, O. Bushmeat hunting changes  
600 regeneration of African rainforests. *Proc. Biol. Sci.* **280**, 20130246 (2013).
- 601 41. Macdonald, D. W. *et al.* Bushmeat trade in the Cross–Sanaga rivers region: Evidence for the  
602 importance of protected areas. *Biol. Conserv.* **147**, 107–114 (2012).
- 603 42. Friant, S., Paige, S. B. & Goldberg, T. L. Drivers of bushmeat hunting and perceptions of zoonoses in  
604 Nigerian hunting communities. *PLoS Negl. Trop. Dis.* **9**, e0003792 (2015).
- 605 43. Fa, J. E. *et al.* Getting to grips with the magnitude of exploitation: Bushmeat in the Cross–Sanaga  
606 rivers region, Nigeria and Cameroon. *Biol. Conserv.* **129**, 497–510 (2006).
- 607 44. Gessain, A., Nakoune, E. & Yazdanpanah, Y. Monkeypox. *N. Engl. J. Med.* **387**, 1783–1793 (2022).
- 608 45. Khodakevich, L. *et al.* Monkeypox virus in relation to the ecological features surrounding human  
609 settlements in Bumba zone, Zaire. *Trop. Geogr. Med.* **39**, 56–63 (1987).
- 610 46. Lloyd-Smith, J. O., Schreiber, S. J., Kopp, P. E. & Getz, W. M. Superspreading and the effect of  
611 individual variation on disease emergence. *Nature* **438**, 355–359 (2005).
- 612 47. Borges, V. *et al.* Viral genetic clustering and transmission dynamics of the 2022 mpox outbreak in  
613 Portugal. *Nat. Med.* **29**, 2509–2517 (2023).
- 614 48. Laurenson-Schafer, H. *et al.* Description of the first global outbreak of mpox: an analysis of global  
615 surveillance data. *The Lancet Global Health* **11**, e1012–e1023 (2023).
- 616 49. Ulaeto, D. O., Dunning, J. & Carroll, M. W. Evolutionary implications of human transmission of  
617 monkeypox: the importance of sequencing multiple lesions. *Lancet Microbe* **3**, e639–e640 (2022).
- 618 50. Nigeria Centre for Disease Control. National monkeypox public health response guidelines. Preprint  
619 at [https://ncdc.gov.ng/themes/common/docs/protocols/96\\_1577798337.pdf](https://ncdc.gov.ng/themes/common/docs/protocols/96_1577798337.pdf).
- 620 51. Park, D. *et al.* *Broadinstitute/viral-Ngs: v1.19.2.* (Zenodo, 2018). doi:10.5281/zenodo.1167849.
- 621 52. Li, H. & Durbin, R. Fast and accurate short read alignment with Burrows–Wheeler transform.  
622 *Bioinformatics* **25**, 1754–1760 (2009).
- 623 53. Li, H. *et al.* The Sequence Alignment/Map format and SAMtools. *Bioinformatics* **25**, 2078–2079  
624 (2009).
- 625 54. Grubaugh, N. D. *et al.* An amplicon-based sequencing framework for accurately measuring intrahost  
626 virus diversity using PrimalSeq and iVar. *Genome Biol.* **20**, 8 (2019).

- 627 55. Minh, B. Q. *et al.* IQ-TREE 2: New Models and Efficient Methods for Phylogenetic Inference in the  
628 Genomic Era. *Mol. Biol. Evol.* **37**, 1530–1534 (2020).
- 629 56. Aksamentov, I., Roemer, C., Hodcroft, E. & Neher, R. Nextclade: clade assignment, mutation calling  
630 and quality control for viral genomes. *J. Open Source Softw.* **6**, 3773 (2021).
- 631 57. Suchard, M. A. *et al.* Bayesian phylogenetic and phylodynamic data integration using BEAST 1.10.  
632 *Virus Evol* **4**, vey016 (2018).
- 633 58. Ayres, D. L. *et al.* BEAGLE 3: Improved Performance, Scaling, and Usability for a High-Performance  
634 Computing Library for Statistical Phylogenetics. *Syst. Biol.* **68**, 1052–1061 (2019).
- 635 59. Rambaut, A., Drummond, A. J., Xie, D., Baele, G. & Suchard, M. A. Posterior summarization in  
636 Bayesian phylogenetics using tracer 1.7. *Syst. Biol.* **67**, 901–904 (2018).
- 637 60. Tavaré, S. Some probabilistic and statistical problems in the analysis of DNA sequences. *Some*  
638 *mathematical question in biology-DNA* (1986).
- 639 61. Zuckerkandl, E. Molecular disease, evolution, and genic heterogeneity. *Horiz. Biochem. Biophys.*  
640 (1962).
- 641 62. Yoder, A. D. & Yang, Z. Estimation of primate speciation dates using local molecular clocks. *Mol. Biol.*  
642 *Evol.* **17**, 1081–1090 (2000).
- 643 63. Ferreira, M. A. R. & Suchard, M. A. Bayesian analysis of elapsed times in continuous-time Markov  
644 chains. *Can. J. Stat.* **36**, 355–368 (2008).
- 645 64. Baele, G., Lemey, P. & Suchard, M. A. Genealogical Working Distributions for Bayesian Model Testing  
646 with Phylogenetic Uncertainty. *Syst. Biol.* **65**, 250–264 (2016).
- 647 65. Xie, W., Lewis, P. O., Fan, Y., Kuo, L. & Chen, M.-H. Improving marginal likelihood estimation for  
648 Bayesian phylogenetic model selection. *Syst. Biol.* **60**, 150–160 (2011).

## 649 Acknowledgements

650 This work is made possible by support from Flu Lab and a cohort of generous donors  
651 through TED's Audacious Project, including the ELMA Foundation, MacKenzie Scott, the  
652 Skoll Foundation, and Open Philanthropy. This work was supported by the Centre  
653 Pasteur of Cameroon. This work was supported by grants from the National Institute of  
654 Allergy and Infectious Diseases grants U01HG007480 (H3Africa), U54HG007480

655 (H3Africa), U01AI151812 (WARN-ID), U19AI135995 (CViSB), U19AI110818 (GCID),  
656 R01AI153044 and R01AI162611). This work was also supported by the World Bank  
657 grants projects ACE-019 and ACE-IMPACT; The Rockefeller Foundation (Grant #2021  
658 HTH); The Africa CDC through the African Society of Laboratory Medicine [ASLM] (Grant  
659 #INV018978), and the Science for Africa Foundation. We thank the Africa CDC for Mpx  
660 diagnostic reagents provided to the surveillance system in Cameroon. We thank  
661 Advanced Micro Devices, Inc. for the donation of massively parallel computing hardware.  
662 Ifeanyi Omah is supported by the Wellcome Trust Hosts, Pathogens & Global Health  
663 program [Wellcome Trust, Grant number 218471/Z/19/Z] in partnership with Tackling  
664 infectious Disease to Benefit Africa, TIBA.

## 665 **Author Contributions**

666 C.H., R.N., P.S., I.J., I.A. conceptualized the study. D.D.D., I.F.O., E.P., A.O.T., M.A.S.,  
667 P.L., K.G.A., A.R., C.H. contributed the methodology. K.G., A.O.T., P.L., M.A.S., A.R.,  
668 P.V. provided software. D.D.D, I.F.O., E.P. performed formal analysis. D.D.D., I.F.O.,  
669 E.P., L.L.M.E, M.H.M.Y, F.M.F.C, A.O.A., A.E.S, M.I.A., O.O.E, O.A.O., A.O., P.E.,  
670 O.A., A.E., O.E., C.C, K.S., A.Akinpelu , A.Ahmad, K.I.I., P.V., A.M., M.Z., A.R. M.G.Y,  
671 G.D.E., I.P.T., L.M., S.I.E., L.E., I.M.E.N., S.F.M., C.C., S.M.A., H.M.M., C.N.B.,  
672 A.G.M.E. conducted the investigation. D.D.D., L.L.M.E, M.H.M.Y, F.M.F.C, A.O.A,  
673 A.E.S, M.I.A., O.O.E, O.A.O, A.O., P.E., O.A., A.E., O.E., C.C, K.S., A.Akinpelu ,  
674 A.Ahmad, K.I.I., D.J.P, P.L., G.M., S.K.T., Y.K.T., O.F., A.H., M.A.S., K.G.A., A.R., R.N.,  
675 C.I., I.J., I.A., S.I.E., provided resources. E.P., I.F.O., D.D.D., A.R., C.T.T., J.R.O.  
676 curated data. E.P., I.F.O., D.D.D wrote the original draft of the manuscript. All authors  
677 reviewed and edited the manuscript. I.F.O., E.P. performed visualization. R.N., C.H.,  
678 C.I., I.J., I.A., P.S., A.R., K.G.A supervised the study. D.D.D., S.I.E., E.P., O.F., C.H.  
679 undertook project administration. C.H., P.S., R.N., S.I.E., K.G.A. acquired funding.

680

## 681 **Competing interest declaration**

682 MAS received grants and contracts from the U.S. Food & Drug Administration, the U.S.  
683 Department of Veterans Affairs and Johnson & Johnson outside the scope of this work.  
684

685

## 686 Extended Data

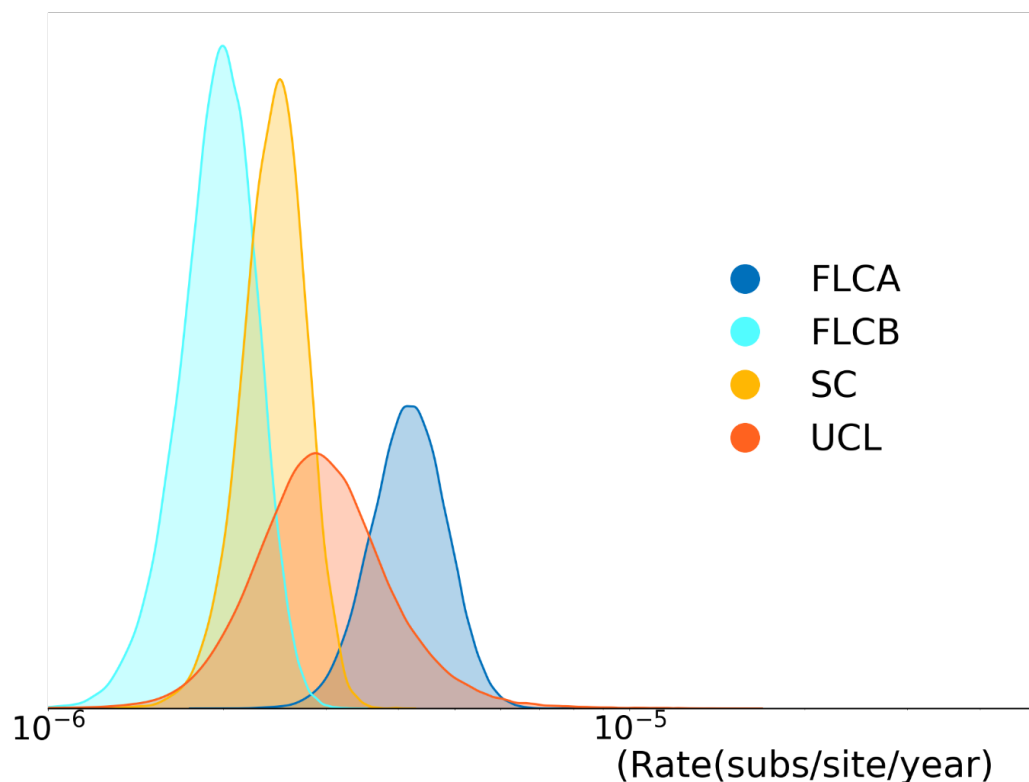

687

688 **Extended Data Figure 1:** Estimates of the evolutionary rate for zoonotic Clade IIb and  
 689 Clade IIa combined under the different clock models

690

691 **Extended Data table 1:** Model testing for analyses of evolutionary rate in the natural reservoir

| Model | Clock rate (95% HPD x10 <sup>-6</sup> ) | Cladell tMRCA                                         | Log MLE      | Log BF         |
|-------|-----------------------------------------|-------------------------------------------------------|--------------|----------------|
| FLC   | 4.29(3.11–5.55)                         | May 30, 1908, (July 6, 1886, to February 24, 1928)    | -259654.2406 | --             |
| FLC   | 2.02(1.45–2.59)                         | October 20, 1542, (June 18, 1401, to October 7, 1664) | -259654.2406 | –              |
| SC    | 2.49(1.90–3.10)                         | April 27, 1624, (April 15, 1523, to October 30, 1712) | -259843.2503 | 189.01 vs FLC  |
| UCL   | 3.33(1.76–6.19)                         | May 24, 1669, (April 17, 1410, to November 18, 1892)  | -259858.1452 | 203.905 vs FLC |

692
